# Supplementary material
Source: PubMed Central journal article supplement (PMC3396149)
Supplement: Supp_Data.pdf [file Supp_Data.pdf]

## Supplementary Data

### Supplementary Materials and Methods

#### *Identification of conserved sequences in novel MicroRNAs*

Sequences of the mature forms of putative MicroRNAs were assessed for conservation in the genomes of other

species using NCBI blast. Conserved sequences were converted into a FASTA format and aligned using MultAlin (<http://multalin.toulouse.inra.fr/multalin/multalin.html>).

SUPPLEMENTARY TABLE S1. SUMMARY OF CLONED SMALL RNAs IN HUMAN MESENCHYMAL STEM CELLS

| ID             | Sequence of small RNA   | Size | Chromosomal location | Stem-loop | Strand | Location   | Start     | End       |
|----------------|-------------------------|------|----------------------|-----------|--------|------------|-----------|-----------|
| hms-smR-1      | CAGAGAAUCCCCGCCCGC      | 19   | 2q21.1               | X         | -      | Intergenic | 132416452 | 132416470 |
| hms-smR-2      | GCCGACCGCCGCCCGCCUCC    | 21   | 10q24.1              | X         | +      | Intergenic | 98592169  | 98592189  |
| hms-smR-3-1    | GGGGUGCAGGAGCGUGUG      | 18   | 11q13.3              | X         | -      | Intron     | 68454908  | 68454925  |
| hms-smR-3-2    |                         |      | 1936.33              | X         | +      | Intron     | 2104184   | 2104201   |
| hms-smR-4      | GCCGCCGCCGCCGUCUCCC     | 19   | 13q33.3              | X         | +      | Exon       | 108518522 | 108518540 |
| hms-smR-5      | CCGUUCCUCCUCCUGAGA      | 19   | Xp22.31              | X         | +      | Intergenic | 6250786   | 6250804   |
| hms-smR-6      | CGGAGGAAAAGAAGGGACGG    | 20   | 8q24.22              | X         | +      | Intron     | 134094593 | 134094612 |
| hms-smR-7      | GGCGGCGGCGGCGGAGGAGC    | 22   | 5p12                 | X         | -      | Exon       | 45695967  | 45695988  |
| hms-smR-8      | AGACGAGAGAGAAGGGCA      | 18   | 10p13                | X         | +      | Intron     | 13660217  | 13660234  |
| hsa-miR-6086-1 | GGAGGUUGGGAAGGGCAGAG    | 20   | Xp22.2               | O         | +      | Intron     | 13518333  | 13518352  |
| hsa-miR-6086-2 |                         |      | 3q21.2               | X         | -      | Intron     | 124914709 | 124914728 |
| hms-smR-10     | ACCGCUCUCCGACCCGCC      | 19   | 19p13.3              | X         | +      | Intron     | 2211048   | 2211066   |
| hms-smR-11     | GGGAGGACGGCGGGGCGC      | 18   | 10q22.3              | X         | +      | Intergenic | 79398465  | 79398482  |
| hms-smR-12     | Redundant of hms-smR-8  |      |                      |           |        |            |           |           |
| hms-smR-13     | GAGCGAGAGAUAGCCUGG      | 18   | 7q34                 | X         | +      | Intergenic | 141616367 | 141616384 |
| hms-smR-14     | CUCUCCCCCGCCCCACCCCG    | 20   | 4p16.3               | X         | +      | Exon       | 750087    | 750106    |
| hms-smR-15     | UCAAUCCUGAGUCCUGCC      | 18   | 7p14.1               | X         | +      | Intron     | 37899317  | 37899334  |
| hms-smR-16     | Redundant of hms-smR-4  |      |                      |           |        |            |           |           |
| hms-smR-17     | GCCCCCGCCCCGCCUCGCC     | 20   | 9q33.3               | X         | +      | Intergenic | 128812593 | 128812612 |
| hms-smR-18-1   | GCAAUGGCGUGAUCUCGGCUCA  | 22   | 1q44                 | X         | +      | Intron     | 247806425 | 247806446 |
| hms-smR-18-2   |                         |      | 2q37.3               | X         | +      | Intron     | 242507589 | 242507610 |
| hms-smR-18-3   |                         |      | 3q29                 | X         | +      | Intron     | 196768399 | 196768420 |
| hms-smR-18-4   |                         |      | 4q35.1               | X         | +      | Intergenic | 184548731 | 184548752 |
| hms-smR-18-5   |                         |      | 5q35.3               | X         | +      | Intergenic | 177601903 | 177601924 |
| hms-smR-18-6   |                         |      | 6q26                 | X         | +      | Intergenic | 163803341 | 163803362 |
| hms-smR-18-7   |                         |      | 7q36.3               | X         | +      | Intergenic | 157887055 | 157887076 |
| hms-smR-18-8   |                         |      | 8q24.3               | X         | +      | Exon       | 145172572 | 145172593 |
| hms-smR-18-9   |                         |      | 9q34.3               | X         | +      | Intron     | 140152008 | 140152029 |
| hms-smR-18-10  |                         |      | 10q26.3              | X         | +      | Intergenic | 133343173 | 133343194 |
| hms-smR-18-11  |                         |      | 11q25                | X         | +      | Intron     | 133947313 | 133947333 |
| hms-smR-18-12  |                         |      | 12q24.33             | X         | +      | Intron     | 130977913 | 130977934 |
| hms-smR-18-13  |                         |      | 13q34                | X         | +      | Intergenic | 114069044 | 114069065 |
| hms-smR-18-14  |                         |      | 14q32.33             | X         | +      | Intergenic | 104362150 | 104362171 |
| hms-smR-18-15  |                         |      | 15q26.3              | X         | +      | Intron     | 101044502 | 101044523 |
| hms-smR-18-16  |                         |      | 16q24.3              | X         | +      | Intron     | 89815674  | 89815695  |
| hms-smR-18-17  |                         |      | 17q25.3              | X         | +      | Intron     | 80152240  | 80152261  |
| hms-smR-18-18  |                         |      | 18q23                | X         | +      | Intron     | 74762556  | 74762577  |
| hms-smR-18-19  |                         |      | 19q13.43             | X         | +      | Intergenic | 58809449  | 58809470  |
| hms-smR-18-20  |                         |      | 20q13.32             | X         | +      | Intron     | 57374404  | 57374425  |
| hms-smR-18-21  |                         |      | 21q22.3              | X         | +      | Intergenic | 47915235  | 47915256  |
| hms-smR-18-22  |                         |      | Xq28                 | X         | +      | Intron     | 153375275 | 153375296 |
| hms-smR-18-23  |                         |      | Yq11.21              | X         | +      | Intergenic | 15092235  | 15092256  |
| hms-smR-19     | GGGAACAGAGUGCAGGGGGC    | 20   | 19p13.3              | X         | +      | Intron     | 4943326   | 4943345   |
| hms-smR-20     | AAGAUGGUGGAGUAAGGAG     | 19   | 3q22.3               | X         | +      | Intron     | 136068565 | 136068583 |
| hms-smR-21     | Redundant of hms-smR-18 |      |                      |           |        |            |           |           |
| hms-smR-22     | GCCUGCCCCGCGCCCCGCC     | 20   | 22q11.21             | X         | +      | Intergenic | 20307669  | 20307688  |
| hms-smR-23-1   | GGCGGCGGGGCGCGGGACG     | 19   | 14q32.2              | X         | -      | Exon       | 100438315 | 100438333 |

(continued)

SUPPLEMENTARY TABLE S1. (CONTINUED)

| <i>ID</i>     | <i>Sequence of small RNA</i> | <i>Size</i> | <i>Chromosomal location</i> | <i>Stem-loop</i> | <i>Strand</i> | <i>Location</i> | <i>Start</i> | <i>End</i> |
|---------------|------------------------------|-------------|-----------------------------|------------------|---------------|-----------------|--------------|------------|
| hms-smR-23-2  |                              |             | 16p13.13                    | X                | +             | Exon            | 11349938     | 11349956   |
| hms-smR-24    | GCCGAGAGAGGGGGGUAGGGA        | 21          | 11q23.3                     | X                | +             | Intron          | 119073121    | 119073141  |
| hms-smR-25    | UCCGGUGAGCUCUCGCGUGGCC       | 21          | 5q13.2                      | X                | +             | Intergenic      | 71182646     | 71182666   |
| hms-smR-26-1  | CAGUGGUGGCGGCGGCGGC          | 19          | 1                           | X                | -             | Exon            | 172628512    | 172628530  |
| hms-smR-26-2  |                              |             | 7q22.1                      | X                | -             | Intron          | 101459624    | 101459642  |
| hms-smR-26-3  |                              |             | 11q21                       | X                | -             | Exon            | 93276460     | 93276478   |
| hms-smR-26-4  |                              |             | 14q32.12                    | X                | +             | Exon            | 93214856     | 93214874   |
| hms-smR-26-5  |                              |             | 16p11.2                     | X                | +             | Exon            | 31196396     | 31196414   |
| hms-smR-26-6  |                              |             | 19q13.12                    | X                | +             | Exon            | 36124656     | 36124674   |
| hms-smR-27    | Redundant of hms-smR-14      |             |                             |                  |               |                 |              |            |
| hsa-miR-6087  | UGAGGCGGGGGGGCGAGC           | 18          | Xq22.3                      | O                | +             | Intergenic      | 108297774    | 108297791  |
| hsa-miR-6088  | AGAGAUGAAGCGGGGGGGCG         | 20          | 19q13.33                    | O                | +             | Intergenic      | 50631752     | 50631771   |
| hms-smR-30    | AAGAGGGACGAGAAGACCCC         | 20          | 16p13.3                     | X                | +             | Exon            | 1664776      | 1664795    |
| hms-smR-31    | GGAAGAGGAAGCAGAAGAAUG        | 21          | 2q32.3                      | X                | +             | Intergenic      | 192644315    | 192644335  |
| hms-smR-32    | GAGAUGGGCGAGCAGAGG           | 18          | 3p21.31                     | X                | +             | Intergenic      | 46512001     | 46512018   |
| hms-smR-33-1  | CUGGCACGGUGAAGAGAC           | 18          | 2p12                        | X                | +             | Intergenic      | 78928772     | 78928789   |
| hms-smR-33-2  |                              |             | Xq22.3                      | X                | +             | Intergenic      | 108297623    | 108297640  |
| hms-smR-35    | CCGCCGCCCGGACCCGCGC          | 22          | 16p13.3                     | X                | +             | Exon            | 765212       | 765233     |
| hms-smR-36    | Redundant of hms-smR-30      |             |                             |                  |               |                 |              |            |
| hms-smR-37    | CUCGCGGCCAGCCCCUC            | 18          | 17q24.3                     | X                | +             | Intron          | 67323096     | 67323113   |
| hms-smR-38    | CUUCCACCGCUCGCCGCC           | 20          | 4q31.21                     | X                | +             | Intron          | 146449094    | 146449113  |
| hms-smR-39    | Redundant of hms-smR-17      |             |                             |                  |               |                 |              |            |
| hms-smR-40-1  | UGAGCCGAGAUCACGCCAUUGCC      | 23          | 1q42.12                     | X                | +             | Intergenic      | 227006474    | 227006496  |
| hms-smR-40-2  |                              |             | 2p14                        | X                | +             | Intron          | 65912635     | 65912657   |
| hms-smR-40-3  |                              |             | 3q28                        | X                | +             | Intergenic      | 190551934    | 190551956  |
| hms-smR-40-4  |                              |             | 5q14.1                      | X                | +             | Intergenic      | 79394748     | 79394770   |
| hms-smR-40-5  |                              |             | 6p25.1                      | X                | +             | Intron          | 5342928      | 5342950    |
| hms-smR-40-6  |                              |             | 7q11.23                     | X                | +             | Intergenic      | 77093414     | 77093436   |
| hms-smR-40-7  |                              |             | 8q24.13                     | X                | +             | Intergenic      | 123185062    | 123185084  |
| hms-smR-40-8  |                              |             | 9q31.3                      | X                | +             | Intergenic      | 114587185    | 114587207  |
| hms-smR-40-9  |                              |             | 11q14.1                     | X                | +             | Intron          | 77814617     | 77814639   |
| hms-smR-40-10 |                              |             | 12p13.33                    | X                | +             | Intron          | 1548231      | 1548253    |
| hms-smR-40-11 |                              |             | 14q22.1                     | X                | +             | Intron          | 52109197     | 52109219   |
| hms-smR-40-12 |                              |             | 15q15.2                     | X                | +             | Intergenic      | 43407689     | 43407711   |
| hms-smR-40-13 |                              |             | 16q12.1                     | X                | +             | Intergenic      | 51291589     | 51291611   |
| hms-smR-40-14 |                              |             | 17p11.2                     | X                | +             | Intron          | 20942820     | 20942842   |
| hms-smR-40-15 |                              |             | 18q22.2                     | X                | +             | Intergenic      | 67887764     | 67887786   |
| hms-smR-40-16 |                              |             | 19q13.42                    | X                | +             | Intergenic      | 54850863     | 54850885   |
| hms-smR-40-17 |                              |             | 20q13.12                    | X                | +             | Intergenic      | 44602306     | 44602328   |
| hms-smR-41-1  | GGAGAAGCCGGCGGGAGC           | 18          | 1p36.22                     | X                | -             | Intergenic      | 11968901     | 11968918   |
| hms-smR-41-2  |                              |             | 5q13.2                      | X                | +             | Intergenic      | 71146768     | 71146785   |
| hms-smR-42    | CGGGCGGCGGCGGGCGGGGC         | 22          | 18p11.22                    | X                | +             | Exon            | 8599682      | 8599703    |
| hms-smR-43    | AGACUCUACAGCGGGGA            | 18          | 3p24.1                      | X                | +             | Intron          | 28440463     | 28440480   |
| hms-smR-44    | GCGAGGGUCCUCCUGCUC           | 20          | 14q32.2                     | X                | +             | Exon            | 100194816    | 100194835  |
| hms-smR-45    | Redundant of hms-smR-4       |             |                             |                  |               |                 |              |            |
| hms-smR-46    | Redundant of hms-smR-31      |             |                             |                  |               |                 |              |            |
| hms-smR-47-1  | GGUCUAGUGGUUAGGAUUC<br>GGCGC | 24          | 1q44                        | X                | +             | Exon            | 249168455    | 249168478  |
| hms-smR-47-2  |                              |             | 2p13.3                      | X                | -             | Exon            | 71273529     | 71273552   |
| hms-smR-47-3  |                              |             | 6p22.1                      | X                | +             | Intergenic      | 28949984     | 28950007   |
| hms-smR-48    | CCCCCCCCGUCCCCCU             | 18          | 1p36.13                     | X                | +             | Intron          | 17336579     | 17336596   |
| hms-smR-49    | Redundant of hms-smR-28      |             |                             |                  |               |                 |              |            |
| hms-smR-50    | Redundant of hms-smR-26      |             |                             |                  |               |                 |              |            |
| hms-smR-51    | CCCCCGCCCUACCUUCCAC          | 20          | 11p15.5                     | X                | +             | Intron          | 620004       | 620023     |
| hms-smR-52    | Redundant of hms-smR-28      |             |                             |                  |               |                 |              |            |
| hms-smR-53    | Redundant of hms-smR-43      |             |                             |                  |               |                 |              |            |
| hms-smR-54-1  | CCCCGCGCCCCGCCCCGGC          | 20          | 2q37.3                      | X                | +             | Exon            | 240322129    | 240322148  |
| hms-smR-54-2  |                              |             | 17q21.31                    | X                | +             | Integenic       | 42836454     | 42836473   |
| hms-smR-55    | GCGGCGGCUCCGUCCCCG           | 18          | 20p11.23                    | X                | +             | Exon            | 18038341     | 18038358   |
| hms-smR-56    | GGAUGGGGCCUGAGAGAAGA         | 20          | 4q32.1                      | X                | +             | Intergenic      | 161763057    | 161763076  |
| hms-smR-58    | GGGCGGCGGAGAGGGAG            | 18          | 6p12.1                      | X                | +             | Intron          | 56886638     | 56886655   |

(continued)

SUPPLEMENTARY TABLE S1. (CONTINUED)

| <i>ID</i>    | <i>Sequence of small RNA</i> | <i>Size</i> | <i>Chromosomal location</i> | <i>Stem-loop</i> | <i>Strand</i> | <i>Location</i> | <i>Start</i> | <i>End</i> |
|--------------|------------------------------|-------------|-----------------------------|------------------|---------------|-----------------|--------------|------------|
| hms-smR-59   | Redundant of hms-smR-22      |             |                             |                  |               |                 |              |            |
| hms-smR-60   | CCUCCAGUUUCUUCUCCUC          | 19          | 18q12.3                     | X                | +             | Intergenic      | 41497631     | 41497649   |
| hms-smR-61   | GGGGCGGAGGCCGCGCGCCG         | 19          | 21q22.3                     | X                | +             | Exon            | 44496014     | 44496032   |
| hms-smR-62   | CGAGCGGCGCGCGCGGGG           | 18          | 9p13.3                      | X                | +             | Intergenic      | 35791654     | 35791671   |
| hsa-miR-6090 | GGGGAGCGAGGGGCGGGGC          | 19          | 11q24.3                     | O                | +             | Intron          | 128392325    | 128392343  |
| hms-smR-64   | UCGGGGCGGCGCGCGCGGGC         | 20          | 13q12.11                    | X                | +             | Intron          | 21277876     | 21277895   |
| hms-smR-65   | CAAUGGGCCGCGCGCUCGCGC        | 22          | 21q22.3                     | X                | +             | Intron          | 45285368     | 45285389   |
| hms-smR-66   | CGCCCGCCGCGCGCGCGCCG         | 23          | 16p13.3                     | X                | +             | Exon            | 2264782      | 2264804    |
| hms-smR-67   | CCCCCCCCCGUUCUUCCC           | 21          | 6p25.3                      | X                | +             | Intron          | 2231177      | 2231197    |
| hms-smR-68   | GGACAGGGAGGACAGGGAGGA        | 21          | 20p12.2                     | X                | +             | Intergenic      | 10969595     | 10969615   |
| hms-smR-69   | ACUAGGACAGCCGAGAGGGG         | 20          | 15q25.1                     | X                | +             | Intergenic      | 78700317     | 78700336   |
| hms-smR-70   | CCUUCUGAACCCGGGACC           | 18          | 7p12.2                      | X                | +             | Intron          | 49904347     | 49904364   |
| hms-smR-71   | Redundant of hms-smR-55      |             |                             |                  |               |                 |              |            |
| hms-smR-72   | Redundant of hms-smR-44      |             |                             |                  |               |                 |              |            |
| hms-smR-73   | Redundant of hms-smR-35      |             |                             |                  |               |                 |              |            |
| hms-smR-75   | Redundant of hms-smR-54      |             |                             |                  |               |                 |              |            |
| hms-smR-76   | GAACCCGACUCCCUUUCG           | 18          | 2q36.3                      | X                | +             | Intron          | 230045521    | 230045538  |
| hms-smR-77   | Redundant of hms-smR-61      |             |                             |                  |               |                 |              |            |
| hms-smR-78   | Redundant of hms-smR-63      |             |                             |                  |               |                 |              |            |
| hms-smR-79   | GAAGGGCAGGCCCGCAGGA          | 19          | 17q25.3                     | X                | +             | Intron          | 79290083     | 79290101   |
| hms-smR-80   | Redundant of hms-smR-26      |             |                             |                  |               |                 |              |            |
| hms-smR-82   | Redundant of hms-smR-65      |             |                             |                  |               |                 |              |            |
| hms-smR-83   | Redundant of hms-smR-35      |             |                             |                  |               |                 |              |            |
| hms-smR-84   | Redundant of hms-smR-10      |             |                             |                  |               |                 |              |            |
| hms-smR-85   | Redundant of hms-smR-58      |             |                             |                  |               |                 |              |            |
| hms-smR-86   | GCCCGUCCCUACACAAGCC          | 19          | 2q36.3                      | X                | +             | Intron          | 227603351    | 227603369  |
| hms-smR-87   | CACGUCUGAUCUGAGGUCGCG        | 21          | 17q12                       | X                | +             | Intron          | 33478255     | 33478275   |
| hms-smR-88   | CCCUUCUCCCCCAACUCU           | 19          | 16q21                       | X                | +             | Intergenic      | 58024643     | 58024661   |
| hsa-miR-6089 | GGAGGCCGGGUGGGGCGG<br>GGCGG  | 24          | Xp22.33                     | O                | +             | Intergenic      | 2537270      | 2537293    |
| hms-smR-90   | Redundant of hms-smR-64      |             |                             |                  |               |                 |              |            |
| hms-smR-91   | GGCGGCGGGGGAGAAGG            | 18          | 22                          | X                | +             | Intron          | 43924317     | 43924331   |
| hms-smR-92   | CCCCCGCCUCAGUCUUUC           | 19          | 17p11.2                     | X                | +             | Intergenic      | 16934869     | 16934887   |
| hms-smR-94   | GUUUCUCAAUCCUCUCCUC          | 20          | Xq12                        | X                | +             | Intergenic      | 64803673     | 64803692   |
| hms-smR-95   | Redundant of hms-smR-4       |             |                             |                  |               |                 |              |            |
| hms-smR-96   | Redundant of hms-smR-43      |             |                             |                  |               |                 |              |            |
| hms-smR-97   | CUGUUUCUCACUGCUGUCCUC        | 22          | 8q12.3                      | X                | +             | Intron          | 65576653     | 65576674   |
| hms-smR-98   | GGAGGUCCGUAGCAGUCCUGA        | 22          | 1q21.1                      | X                | +             | Intron          | 145277363    | 145277383  |
| hms-smR-99   | UUCCCCACCGGCCAGCCCU          | 20          | Xq26.2                      | X                | +             | Intergenic      | 132410986    | 132411005  |
| hms-smR-100  | CCCCCGCCCCGCGUCCUC           | 20          | Xp22.2                      | X                | -             | Intergenic      | 9983089      | 9983108    |

SUPPLEMENTARY TABLE S2. THE SEQUENCES OF 5 NOVEL MICRORNAs ARE CONSERVED ACROSS SEVERAL SPECIES

| <i>ID</i>      |     | <i>hsa-miR-6086</i>           |       |  |  |  |  |  |  |  |  |  |  |  |  |  |  |  |  |  |  |
|----------------|-----|-------------------------------|-------|--|--|--|--|--|--|--|--|--|--|--|--|--|--|--|--|--|--|
| <i>Species</i> |     |                               |       |  |  |  |  |  |  |  |  |  |  |  |  |  |  |  |  |  |  |
| Human          | G G | A G G U U G G G A A G G G C A | G A G |  |  |  |  |  |  |  |  |  |  |  |  |  |  |  |  |  |  |
| Orangutan      | G G | A G G U U G G G A A G G G C A | G A G |  |  |  |  |  |  |  |  |  |  |  |  |  |  |  |  |  |  |
| Chimpanzee     | G   | A G G U U G G G A A G G G C A | G     |  |  |  |  |  |  |  |  |  |  |  |  |  |  |  |  |  |  |
| Monkey         |     | A G G U U G G G A A G G G C A | G A G |  |  |  |  |  |  |  |  |  |  |  |  |  |  |  |  |  |  |
| Dog            | G G | A G G U U G G G A A G G G C A |       |  |  |  |  |  |  |  |  |  |  |  |  |  |  |  |  |  |  |

  

| <i>ID</i>      |     | <i>hsa-miR-6087</i>           |  |  |  |  |  |  |  |  |  |  |  |  |  |  |  |  |  |
|----------------|-----|-------------------------------|--|--|--|--|--|--|--|--|--|--|--|--|--|--|--|--|--|
| <i>Species</i> |     |                               |  |  |  |  |  |  |  |  |  |  |  |  |  |  |  |  |  |
| Human          | U G | A G G C G G G G G G C G A G C |  |  |  |  |  |  |  |  |  |  |  |  |  |  |  |  |  |
| Orangutan      | U G | A G G C G G G G G G C G A G C |  |  |  |  |  |  |  |  |  |  |  |  |  |  |  |  |  |
| Chimpanzee     | U G | A G G C G G G G G G C G A G C |  |  |  |  |  |  |  |  |  |  |  |  |  |  |  |  |  |
| Monkey         | U G | A G G C G G G G G G C G A G C |  |  |  |  |  |  |  |  |  |  |  |  |  |  |  |  |  |
| Dog            | U G | A G G C G G G G G G C G A G C |  |  |  |  |  |  |  |  |  |  |  |  |  |  |  |  |  |

  

| <i>ID</i>      |     | <i>hsa-miR-6088</i>             |       |  |  |  |  |  |  |  |  |  |  |  |  |  |  |  |  |
|----------------|-----|---------------------------------|-------|--|--|--|--|--|--|--|--|--|--|--|--|--|--|--|--|
| <i>Species</i> |     |                                 |       |  |  |  |  |  |  |  |  |  |  |  |  |  |  |  |  |
| Human          | A G | A G A U G A A G C G G G G G G G | G C G |  |  |  |  |  |  |  |  |  |  |  |  |  |  |  |  |
| Chimpanzee     |     | A G A U G A A G C G G G G G G G | G C G |  |  |  |  |  |  |  |  |  |  |  |  |  |  |  |  |
| Monkey         | A G | A G A U G A A G C G G G G G G G |       |  |  |  |  |  |  |  |  |  |  |  |  |  |  |  |  |
| Cattle         |     | A G A U G A A G C G G G G G G G | G C   |  |  |  |  |  |  |  |  |  |  |  |  |  |  |  |  |
| Zebrafish      | A G | A G A U G A A G C G G G G G G G |       |  |  |  |  |  |  |  |  |  |  |  |  |  |  |  |  |

  

| <i>ID</i>      |       | <i>hsa-miR-6089</i>                       |       |  |  |  |  |  |  |  |  |  |  |  |  |  |  |  |  |  |  |
|----------------|-------|-------------------------------------------|-------|--|--|--|--|--|--|--|--|--|--|--|--|--|--|--|--|--|--|
| <i>Species</i> |       |                                           |       |  |  |  |  |  |  |  |  |  |  |  |  |  |  |  |  |  |  |
| Human          | G G A | G G C C G G G G U G G G G C G G G G C G G | C G G |  |  |  |  |  |  |  |  |  |  |  |  |  |  |  |  |  |  |
| Orangutan      | G G A | G G C C G G G G U G G G G C G G G G C G G |       |  |  |  |  |  |  |  |  |  |  |  |  |  |  |  |  |  |  |
| Monkey         |       | G G C C G G G G U G G G G C G G G G C G G | C G G |  |  |  |  |  |  |  |  |  |  |  |  |  |  |  |  |  |  |
| Mouse          |       | G G C C G G G G U G G G G C G G G G C G G | C G G |  |  |  |  |  |  |  |  |  |  |  |  |  |  |  |  |  |  |
| Cattle         | G G A | G G C C G G G G C G G G G C G G G G C G G | C G G |  |  |  |  |  |  |  |  |  |  |  |  |  |  |  |  |  |  |

  

| <i>ID</i>      |         | <i>hsa-miR-6090</i>       |  |  |  |  |  |  |  |  |  |  |  |  |  |  |  |  |  |
|----------------|---------|---------------------------|--|--|--|--|--|--|--|--|--|--|--|--|--|--|--|--|--|
| <i>Species</i> |         |                           |  |  |  |  |  |  |  |  |  |  |  |  |  |  |  |  |  |
| Human          | G G G G | A G C G A G G G C G G G C |  |  |  |  |  |  |  |  |  |  |  |  |  |  |  |  |  |
| Orangutan      | G G G G | A G C G A G G G C G G G C |  |  |  |  |  |  |  |  |  |  |  |  |  |  |  |  |  |
| Chimpanzee     | G G G G | A G C G A G G G C G G G C |  |  |  |  |  |  |  |  |  |  |  |  |  |  |  |  |  |
| Monkey         | G G G G | A G C G A G G G C G G G C |  |  |  |  |  |  |  |  |  |  |  |  |  |  |  |  |  |
| Dog            | G G G G | A G C G A G G G C G G G C |  |  |  |  |  |  |  |  |  |  |  |  |  |  |  |  |  |

Conserved sequence marked in gray.

SUPPLEMENTARY TABLE S3. OLIGONUCLEOTIDE PRIMERS FOR RT-PCR OR POLY(A)-TAILED RT-PCR ANALYSIS ON MATURE MICRORNA

| ID           | Primer sequence (5'-3')                                                                           |
|--------------|---------------------------------------------------------------------------------------------------|
| CDH5 3'UTR F | GCTCTAGAGCGGAAGAGCTGAGACCT                                                                        |
| CDH5 3'UTR R | GCTCTAGAGCGTACTTGTTCATGCACC                                                                       |
| ENG 3'UTR F  | GCTCTAGAGCCTCCTCGGAGAGCAG                                                                         |
| ENG 3'UTR R  | GCTCTAGAGCTCATGGTCTGATTTATTGGT                                                                    |
| CDH5 7mt F   | CCCTGCCCTGCCGTTAAGATGTGGTCACCCATGC                                                                |
| CDH5 7mt R   | GCATGGGTGACCACATCTTAACGGCAGGGCAGGG                                                                |
| ENG 7mt F    | CGCGCCTACCCTTCGATAAGACCTCTCAGAGGCCTG                                                              |
| ENG 7mt R    | CAGGCCTCTGAGAGGTCTTATCGAAGGGTAGGCGCG                                                              |
| Oct4 F       | GACAACAATGAAAATCTTCAGGAG                                                                          |
| Oct4 R       | CTGGCGCCGGTTACAGAACCA                                                                             |
| Sox2 F       | GTGGAAACTTTTGTCCGAGAC                                                                             |
| Sox2 R       | TGGAGTGGGAGGAAGAGGTAAC                                                                            |
| Nanog F      | ATGCCTGTGATTTGTGGGCC                                                                              |
| Nanog R      | GCCAGTTGTTTTCTGCCAC                                                                               |
| 18S rRNA F   | TACCTACCTGGTTGATCCTG                                                                              |
| 18S rRNA R   | GGGTTGGTTTTGATCTGATA                                                                              |
| hsa-miR-6088 | AGAGATGAAGCGGGGGGGCG                                                                              |
| hsa-miR-6089 | GGAGCCCGGGTGGGGCGGGGCGG                                                                           |
| hsa-miR-6090 | GGGGAGCGAGGGGCGGGGC                                                                               |
| RTQ-UNIr     | CGAATTCTAGAGCTCGAGGCAGG                                                                           |
| RTQ adaptor  | CGAATTCTAGAGCTCGAGGCAGGCGACATGGCTGGCTAGTTAAGCTTGGTA<br>CCGAGCTCGGATCCACTAGTCC(T) <sub>25</sub> VN |

In RTQ adaptor, V is A, G, or C; N is A, G, C, or T.  
UTR, untranslated region; RT-PCR, reverse transcription-PCR.

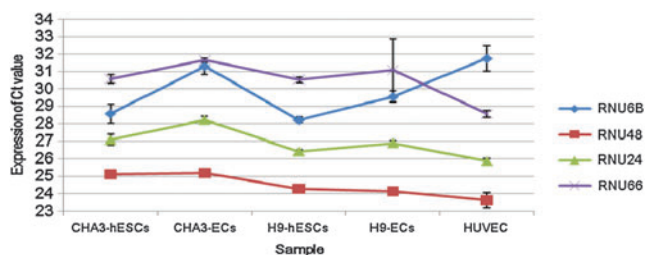

SUPPLEMENTARY FIG. S1. Expression profile of 4 human snoRNAs as endogenous MicroRNA controls across 5 cell types.

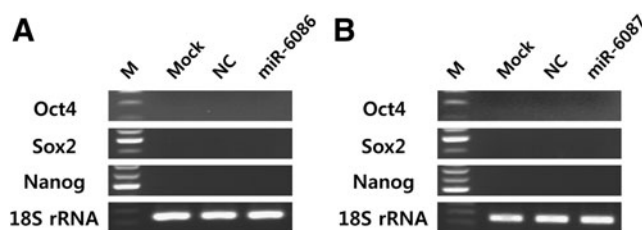

SUPPLEMENTARY FIG. S2. hsa-miR-6086 and -6087 do not directly affect reprogramming factors, such as Oct4, Sox2, and Nanog. M (DNA size marker; Bionner D-1030).
